# Supplementary figures and images for: Rapid Assessment of Rice Quality Traits Using Low-Cost Digital Technologies
Source: MDPI journal article supplement (doi:10.3390/foods11091181), 2022-04-19

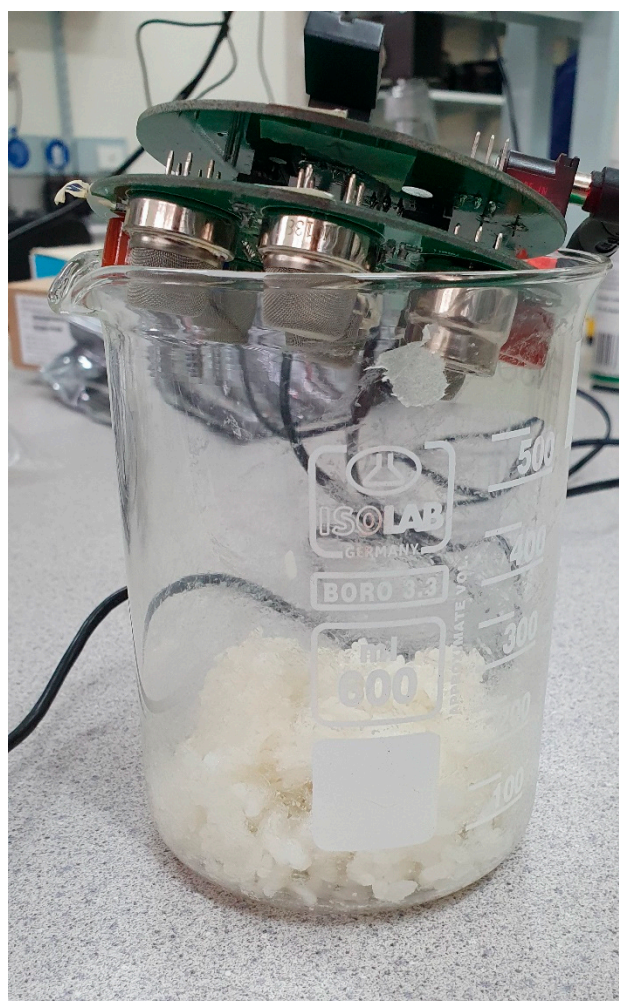

**Figure S1.** Set up of the electronic nose measuring a cooked rice sample.

Supplement: s1 [file s1]
